# Supplementary material
Source: PubMed Central journal article supplement (PMC6425968)
Supplement: NIHMS984878-supplement-esi.pdf [file NIHMS984878-supplement-esi.pdf]

## New thiophene-based C<sub>60</sub> fullerene derivatives as efficient electron transporting materials for perovskite solar cells

Edison Castro,<sup>a†\*</sup> Olivia Fernandez-Delgado,<sup>a†</sup> Funda Arslan,<sup>a</sup> Gerardo Zavala,<sup>a</sup> Tingyuan Yang,<sup>a</sup> Sairaman Seetharaman,<sup>b</sup> Francis D'Souza,<sup>b</sup> and Luis Echegoyen<sup>\*a</sup>

<sup>a</sup> Department of Chemistry, University of Texas at El Paso, 500 West University Avenue, El Paso, TX 79968, United States

<sup>b</sup> Department of Chemistry, University of North Texas Denton, TX 76203-5017, United States

\*E-mail: eacastroortillo@utep.edu

\*E-mail: echegoyen@utep.edu

### Device Characterization

Current-Voltage ( $J$ - $V$ ) characteristics of photovoltaic cells were tested using a Keithley 2420 source meter under a Photo Emission Tech SS100 Solar Simulator, and the light intensity was calibrated by a standard Si solar cell. External quantum efficiency (EQE) was measured using a Bentham (from Bentham Instruments Ltd) measurement system. The light intensity was calibrated using a single-crystal Si photovoltaic cell as reference. The  $J$ - $V$  and EQE measurements were obtained in air. The scanning electron microscopy (SEM) images were collected using a ZEISS Sigma FE-SEM, where the electron beam was accelerated in the range of 500 V to 30 kV. Film thicknesses were measured using a KLA Tencor profilometer. The steady-state PL spectra were recorded on a Horiba Yvon Nanolog spectrometer coupled with a time-correlated single photon counting (TCSPC) with nanoLED excitation sources for time-resolved emission measurements.

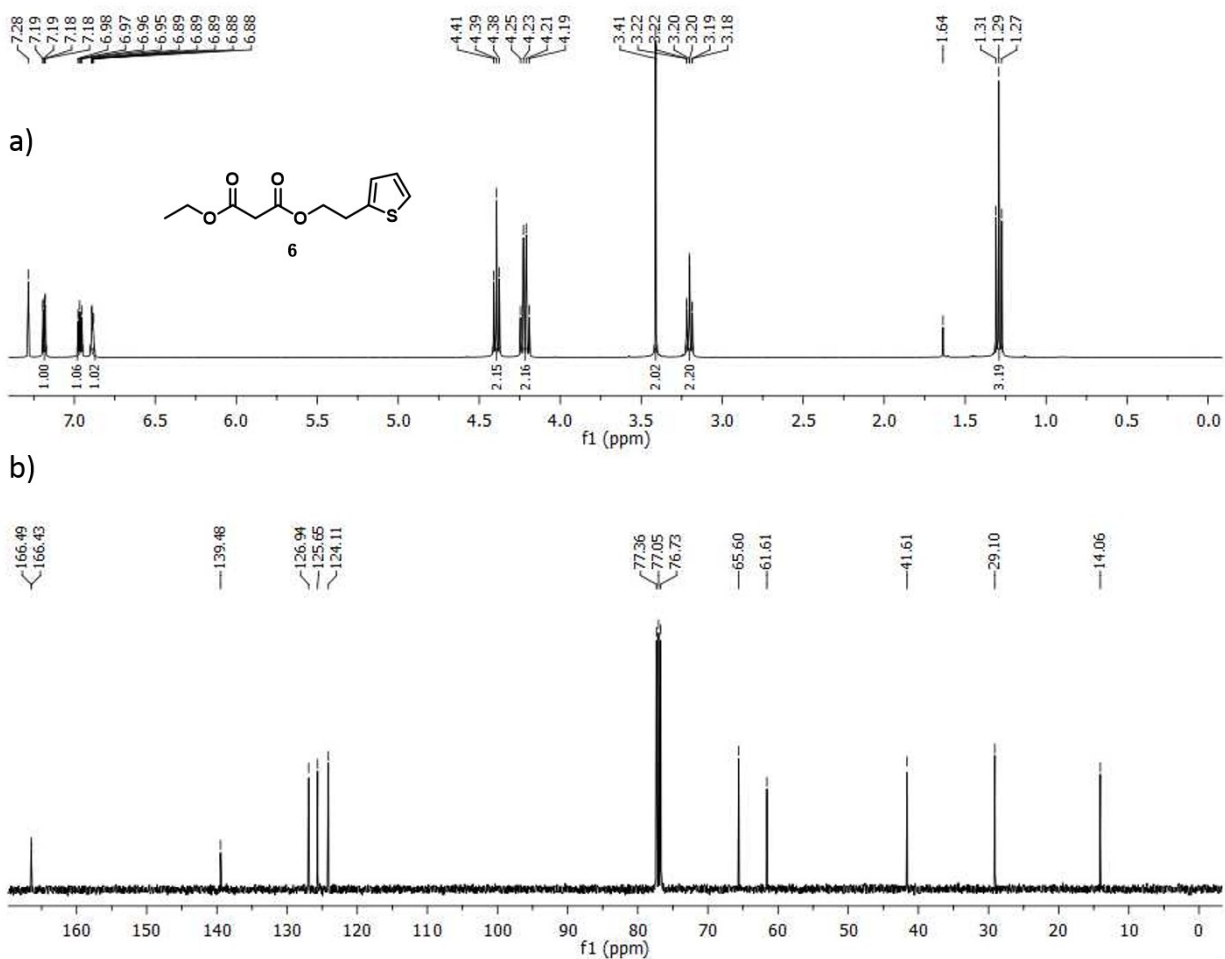

**Figure S1:** a)  $^1\text{H}$  and b)  $^{13}\text{C}$  NMR spectra of compound **6**.

$^1\text{H}$  NMR (400 MHz,  $\text{CDCl}_3$ )  $\delta$  7.18 (dd, 1H), 6.97 (dd, 1H), 6.89-6.88 (m, 1H), 4.39 (t, 2H), 4.22 (q, 2H), 3.41 (s, 2H), 3.20 (t, 2H), 1.29 (t, 3H) ppm.

$^{13}\text{C}$  NMR (100 MHz,  $\text{CDCl}_3$ )  $\delta$  166.5, 166.4, 139.5, 126.9, 125.7, 124.1, 65.6, 61.6, 41.6, 29.1, 14.1 ppm.

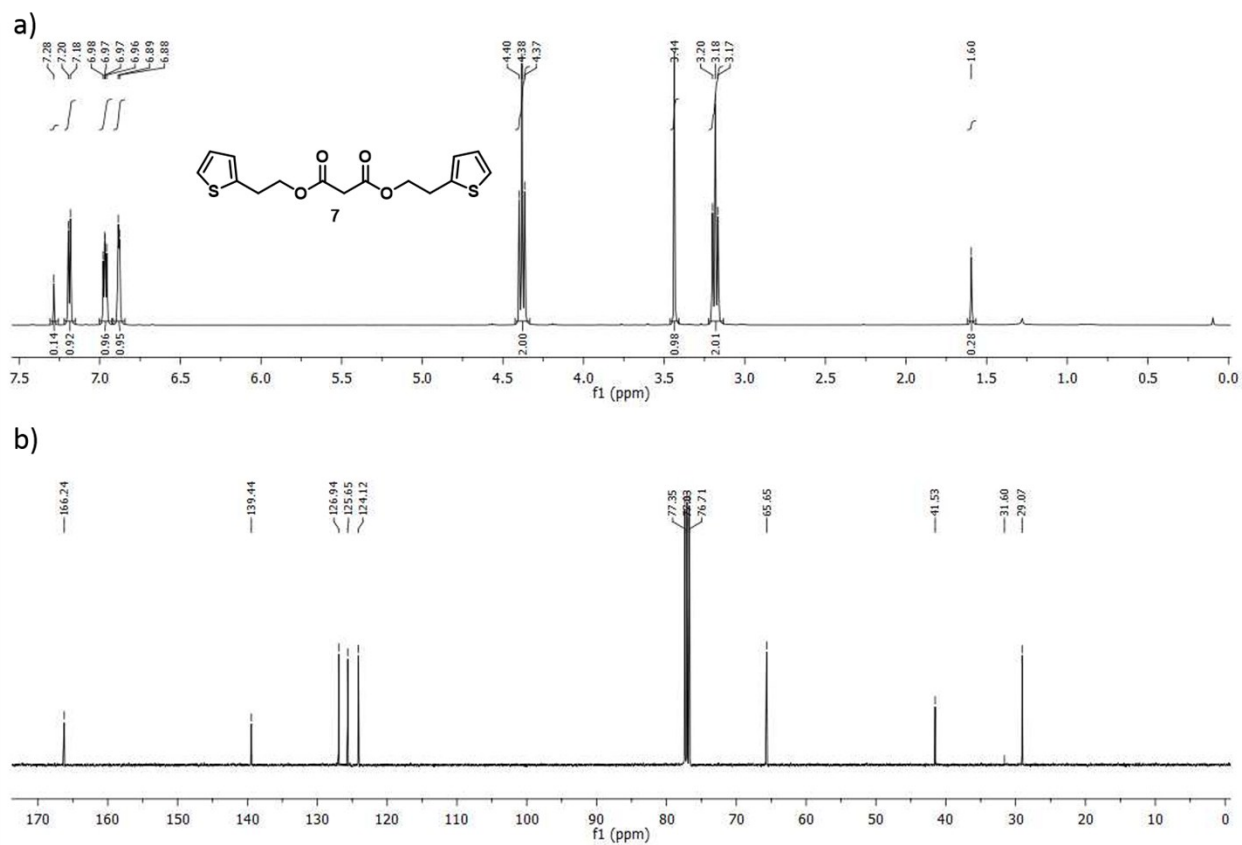

**Figure S2:** a)  $^1\text{H}$  and b)  $^{13}\text{C}$  NMR spectra of compound 7.

$^1\text{H}$  NMR (400 MHz,  $\text{CDCl}_3$ )  $\delta$  7.19 (d, 2H), 6.97 (t, 2H), 6.89 (d, 2H), 4.38 (t, 4H), 3.44 (s, 2H), 3.18 (t, 4H) ppm.

$^{13}\text{C}$  NMR (100 MHz,  $\text{CDCl}_3$ )  $\delta$  166.4, 139.5, 127.3, 125.7, 124.1, 65.7, 41.5, 29.1 ppm.

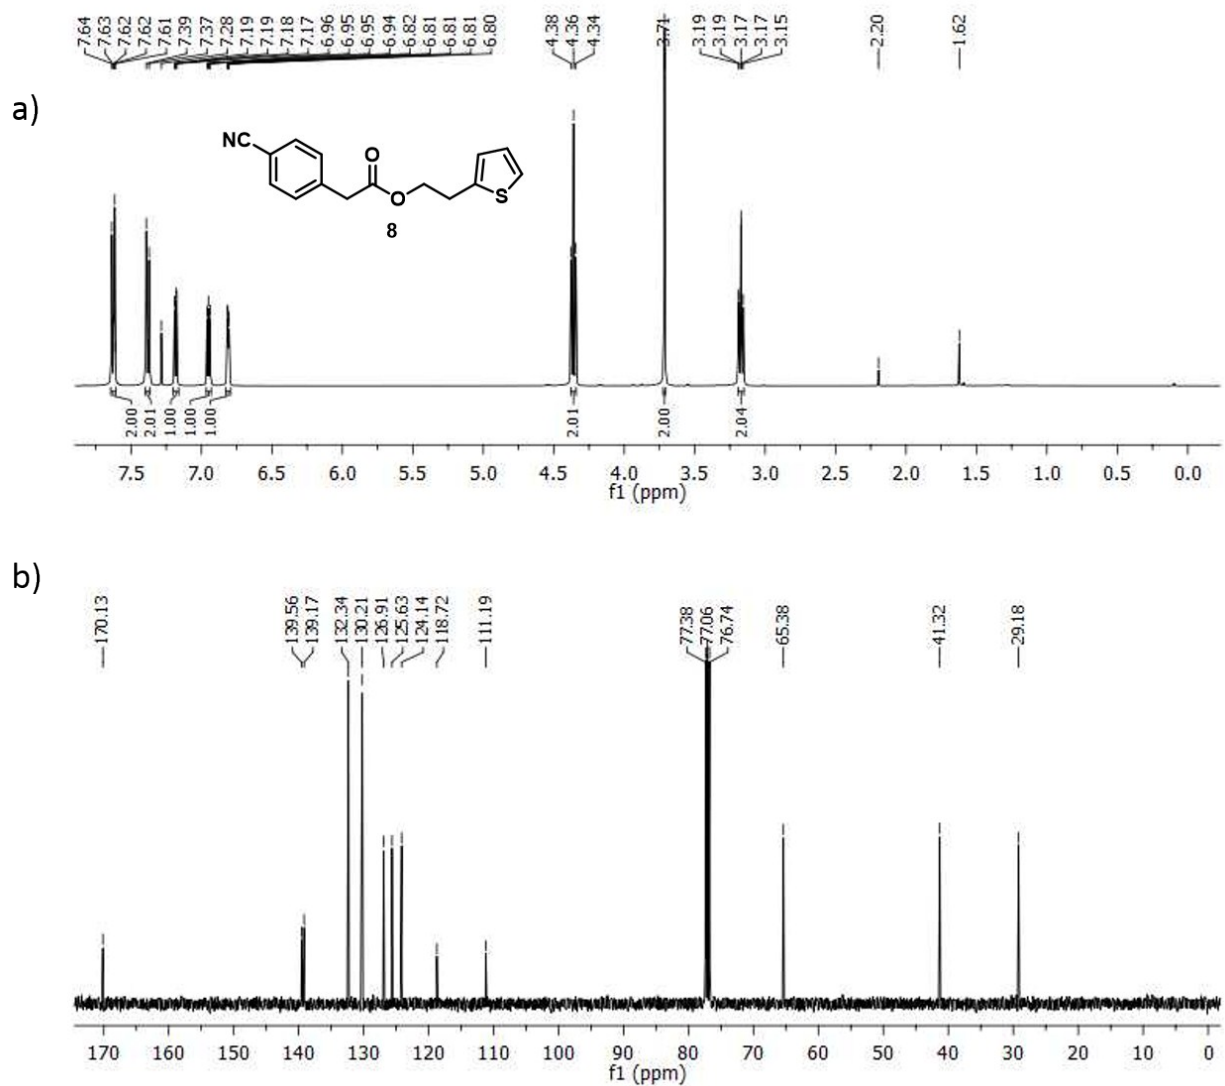

**Figure S3:** a) <sup>1</sup>H and b) <sup>13</sup>C NMR spectra of compound **8**.

<sup>1</sup>H NMR (400 MHz, CDCl<sub>3</sub>) δ 7.62-7.61 (m, 2H), 7.38 (d, 2H), 7.18 (dd, 1H), 6.95 (dd, 1H), 6.81- 6.80 (m, 1H), 4.36 (t, 2H), 3.71 (s, 1H), 3.17 (t, 1H) ppm.

<sup>13</sup>C NMR (100 MHz, CDCl<sub>3</sub>) δ 170.1, 139.6, 139.2, 132.3, 130.2, 126.9, 125.6, 124.1, 118.7, 111.2, 65.4, 41.3, 29.2 ppm.

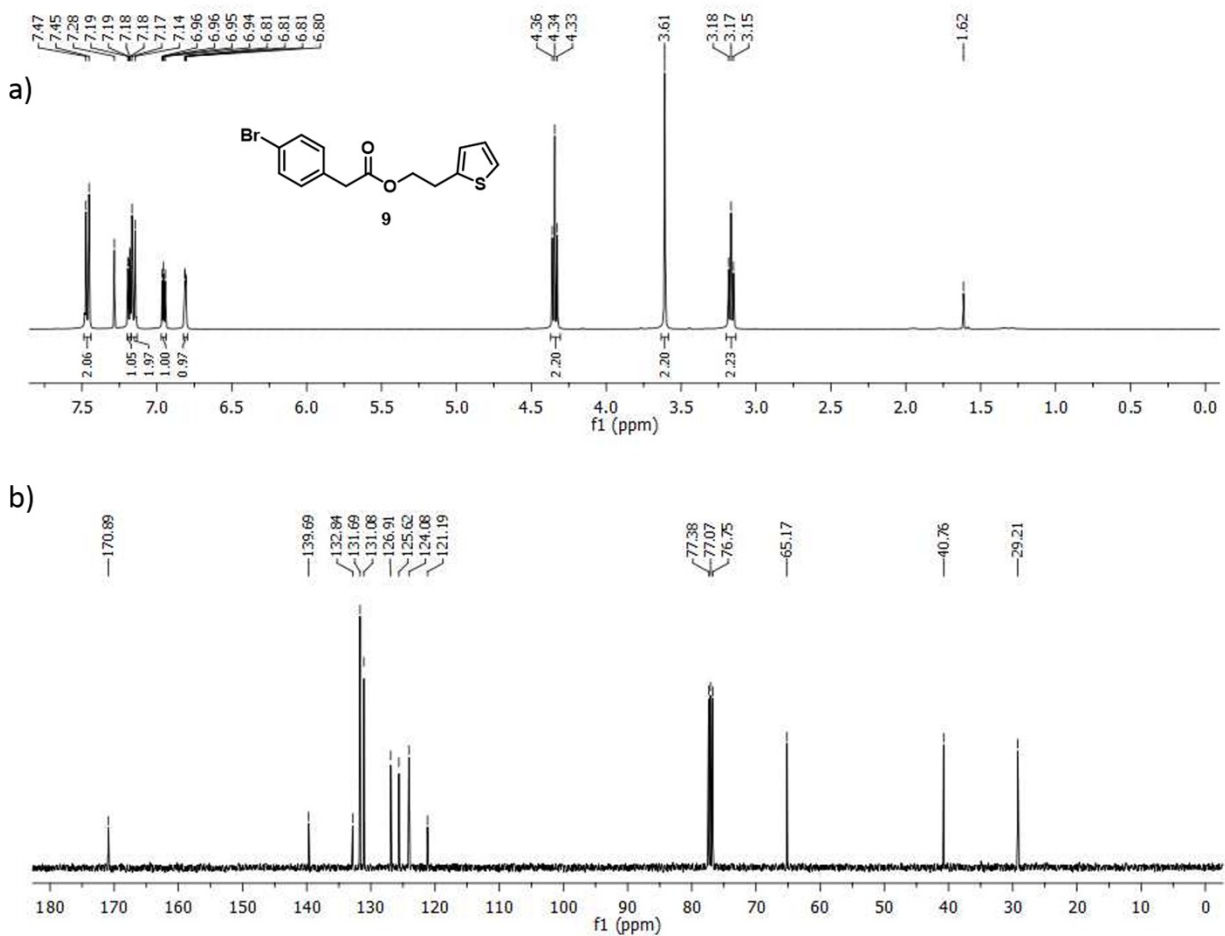

**Figure S4:** a) <sup>1</sup>H and b) <sup>13</sup>C NMR spectra of compound 9.

<sup>1</sup>H NMR (400 MHz, CDCl<sub>3</sub>) δ 7.46 (d, 2H), 7.19 (dd, 1H), 7.16 (d, 2H), 6.95 (dd, 1H), 6.81 (dd, 1H), 4.34 (t, 2H), 3.61 (s, 2H), 3.16 (t, 2H) ppm.

<sup>13</sup>C NMR (100 MHz, CDCl<sub>3</sub>) δ 170.9, 139.7, 132.8, 131.7, 131.1, 126.9, 125.6, 124.1, 121.2, 65.2, 40.7, 29.2 ppm.

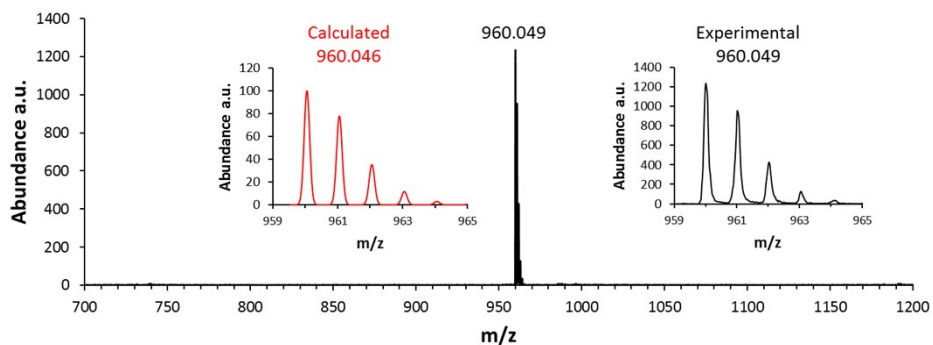

**Figure S5:** MALDI-TOF-MS spectrum of compound **10**.

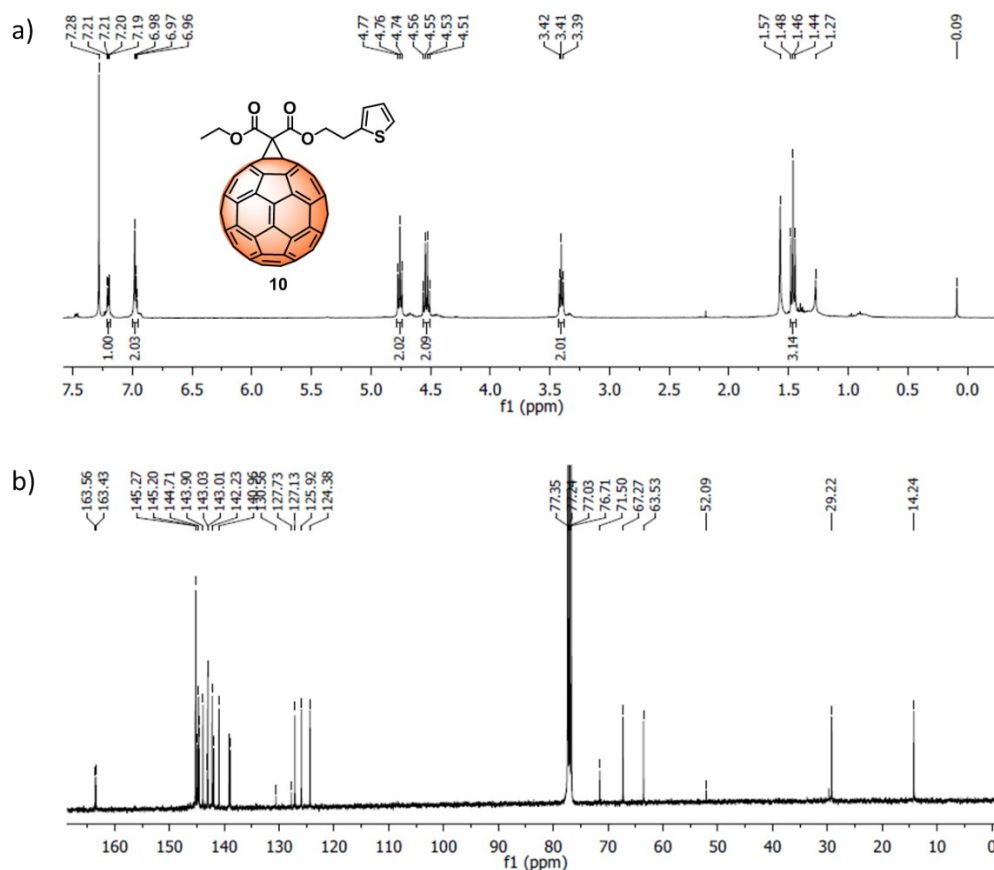

**Figure S6:** a)  $^1\text{H}$  and b)  $^{13}\text{C}$  NMR spectra of compound **10**.

$^1\text{H}$  NMR (400 MHz,  $\text{CDCl}_3$ )  $\delta$  7.20 (dd, 1H), 6.98-6.96 (m, 2H), 4.76 (t, 2H), 4.54 (q, 2H), 3.40 (t, 2H), 1.46 (t, 3H) ppm.

$^{13}\text{C}$  NMR (100 MHz,  $\text{CDCl}_3$ )  $\delta$  163.6, 163.4, 145.4, 145.3, 145.2, 144.9, 144.7, 144.6, 144.6, 143.9, 143.2, 143.1, 143.0, 143.0, 142.2, 142.0, 141.9, 141.0, 139.1, 139.1, 138.9, 130.6, 127.7, 127.1, 125.9, 124.4, 77.2, 71.5, 67.3, 63.5, 52.1, 29.2, 14.2 ppm.

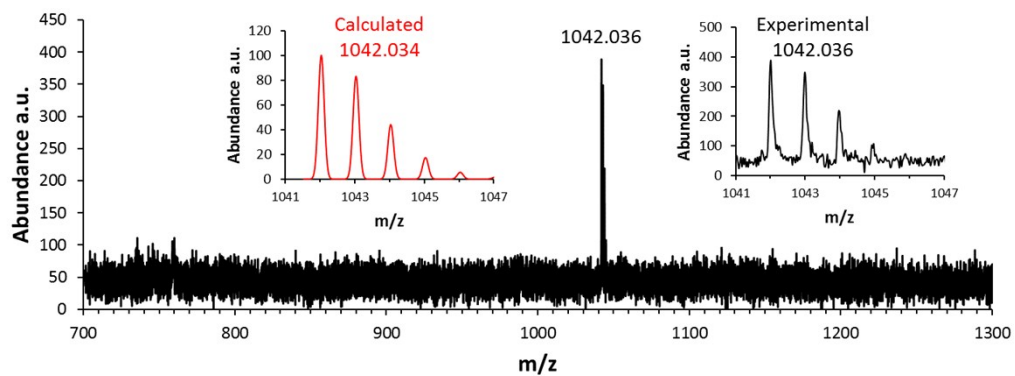

Figure S7: MALDI-TOF-MS spectrum of compound **11**.

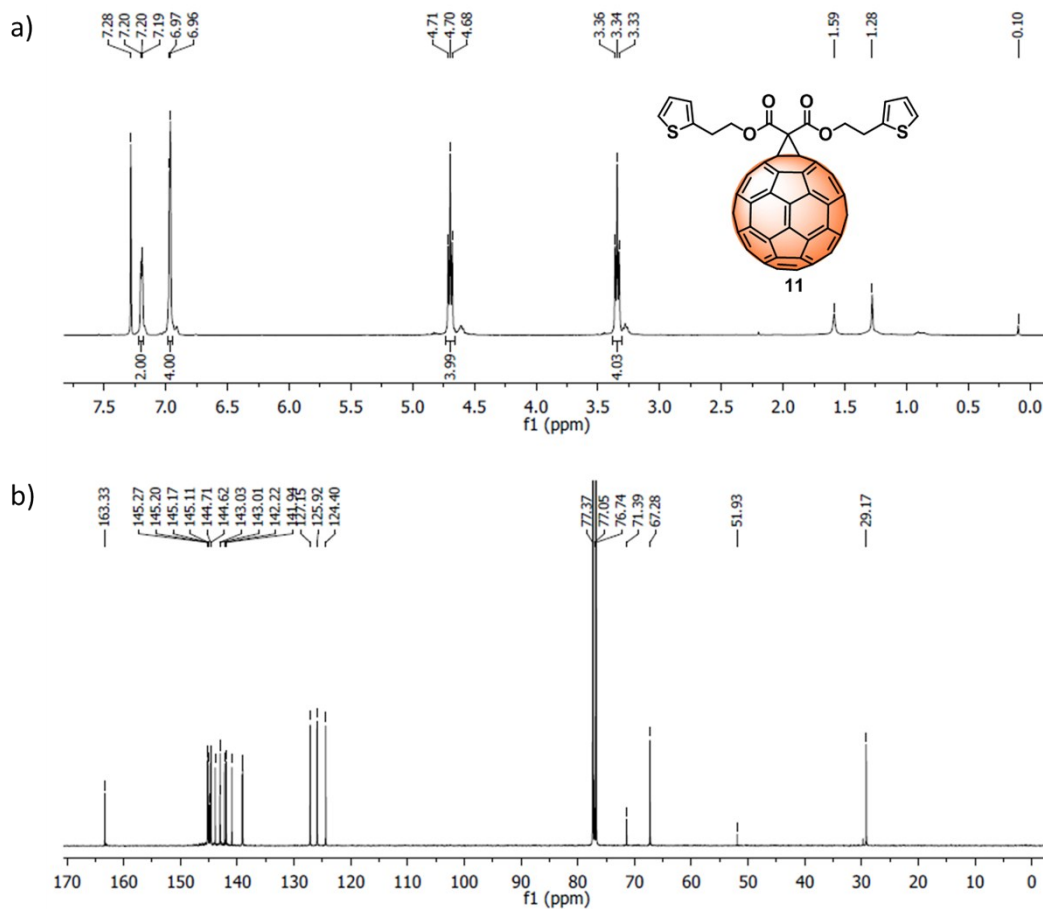

Figure S8: a)  $^1\text{H}$  and b)  $^{13}\text{C}$  NMR spectra of compound **11**.

$^1\text{H}$  NMR (400 MHz,  $\text{CDCl}_3$ )  $\delta$  7.20– 7.19 (m, 2H), 6.97 (d, 4H), 4.70 (t, 4H), 3.34 (t, 4H) ppm.

$^{13}\text{C}$  NMR (100 MHz,  $\text{CDCl}_3$ )  $\delta$  163.3, 145.3, 145.2, 145.1, 145.0, 144.9, 144.7, 144.6, 144.5, 143.9, 143.1, 143.0, 142.9, 142.2, 141.9, 140.9, 139.1, 139.0, 127.2, 125.9, 124.4, 71.4, 67.3, 51.9, 29.2 ppm.

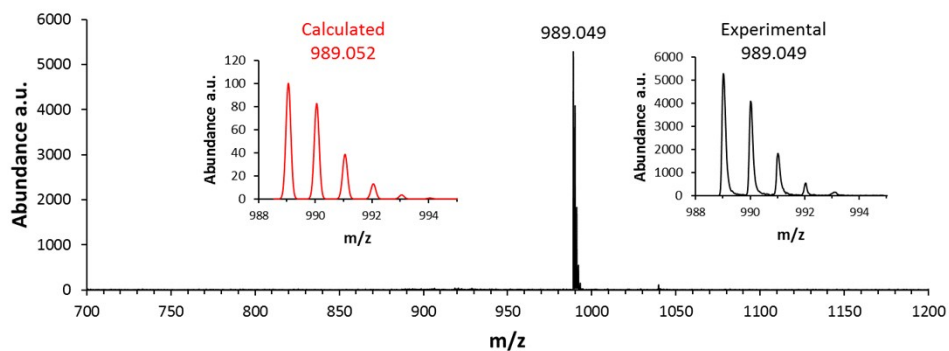

**Figure S9:** MALDI-TOF-MS spectrum of compound **11**.

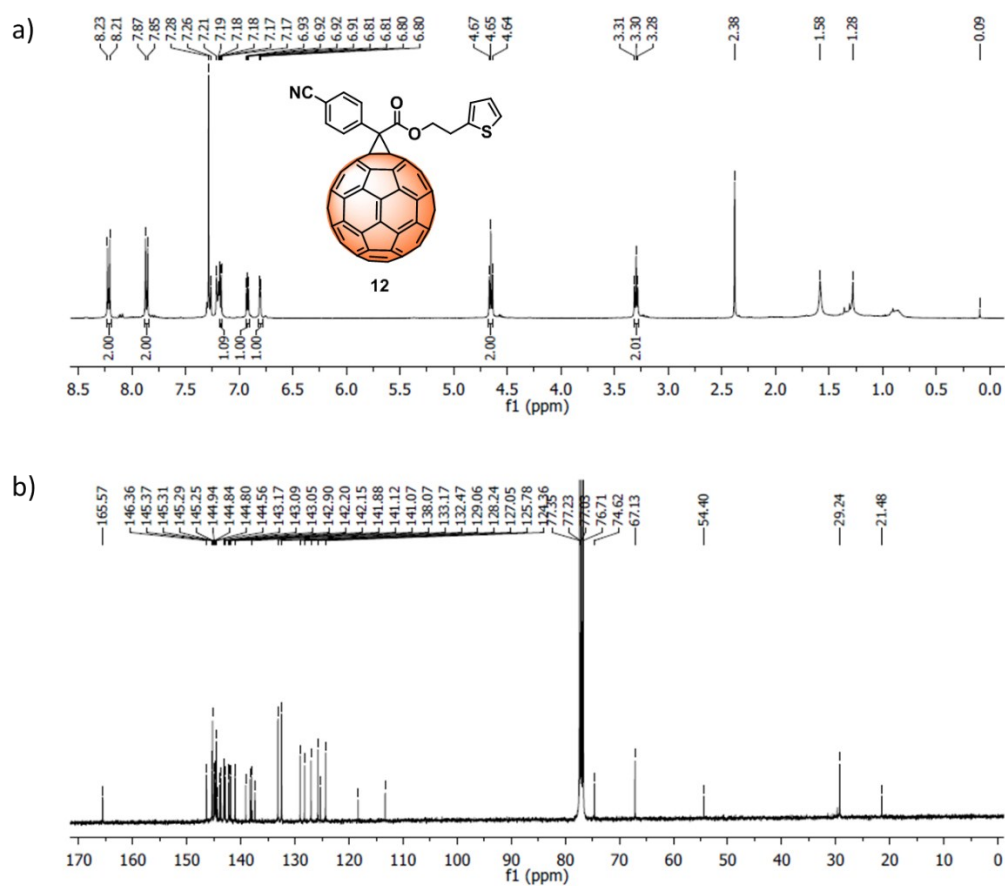

**Figure S10:** a)  $^1\text{H}$  and b)  $^{13}\text{C}$  NMR spectra of compound **12**.

$^1\text{H}$  NMR (400 MHz,  $\text{CDCl}_3$ )  $\delta$  8.22 (dd, 2H), 7.86 (dd, 2H), 7.18 (dd, 1H), 6.92 (dd, 1H), 6.81 (dd, 1H), 4.65 (t, 2H), 3.30 (t, 2H) ppm.

$^{13}\text{C}$  NMR (100 MHz,  $\text{CDCl}_3$ )  $\delta$  165.6, 146.4, 145.4, 145.3, 145.3, 145.2, 144.9, 144.8, 144.8, 144.7, 144.6, 144.5, 144.4, 143.9, 143.7, 143.2, 143.1, 143.0, 142.9, 142.3, 142.2, 142.1, 141.9, 141.1, 141.0, 139.1, 138.3, 138.1, 137.4, 133.2, 132.5, 129.1, 128.2, 127.1, 125.8, 125.31, 124.4, 118.3, 113.3, 77.2, 74.6, 67.1, 54.4, 29.2, 21.5 ppm.



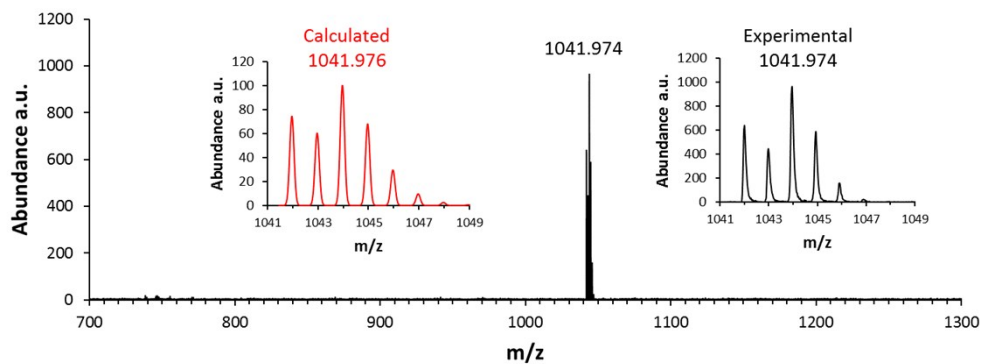

**Figure S11:** MALDI-TOF-MS spectrum of compound **13**.

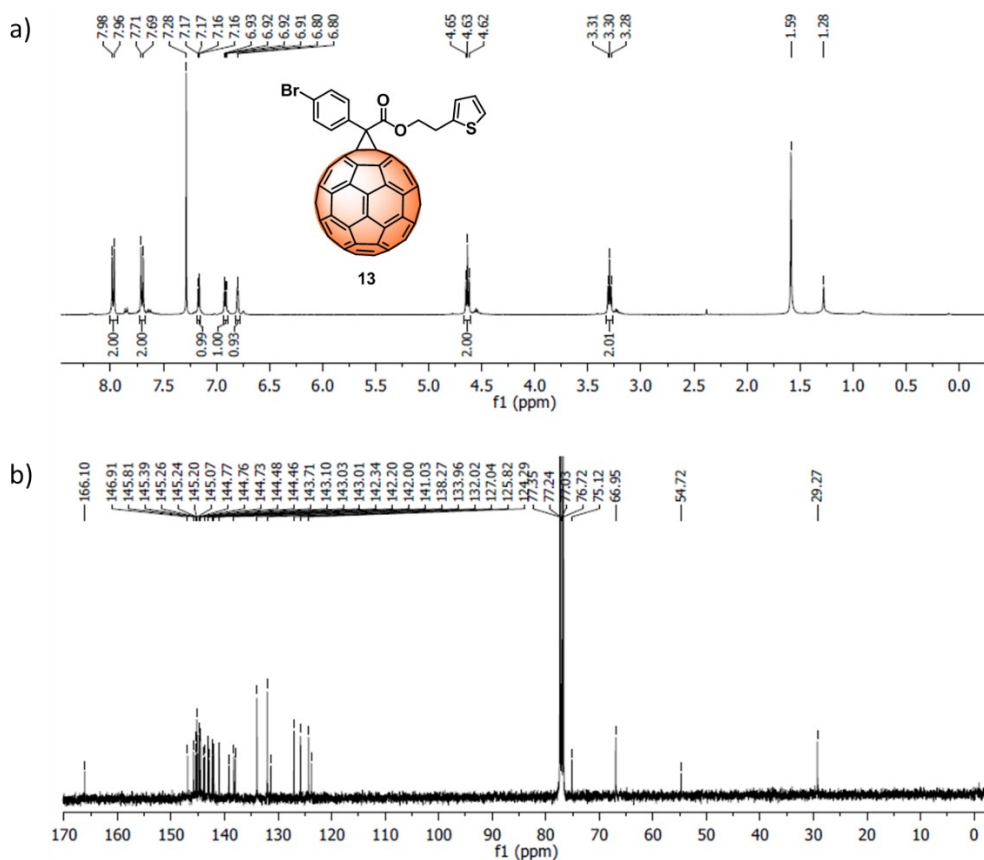

**Figure S12:** a)  $^1\text{H}$  and b)  $^{13}\text{C}$  NMR spectra of compound **13**.

$^1\text{H}$  NMR (400 MHz,  $\text{CDCl}_3$ )  $\delta$  7.97 (d, 2H) 7.70 (d, 2H), 7.17 (dd, 1H) 6.92 (dd, 1H) 6.81 (d, 1H), 4.63 (t, 2H), 3.29 (t, 2H) ppm.

$^{13}\text{C}$  NMR (100 MHz,  $\text{CDCl}_3$ )  $\delta$  166.1, 146.9, 145.8, 145.4, 145.3, 145.2, 145.1, 144.8, 144.7, 144.6, 144.5, 144.4, 144.3, 143.9, 143.7, 143.1, 143.0, 143.0, 142.9, 142.9, 142.3, 142.2, 142.1, 142.0, 141.0, 141.0, 139.2, 138.3, 138.0, 134.0, 132.0, 131.4, 127.0, 125.8, 124.3, 123.8, 77.2, 75.1, 66.9, 54.7, 29.3 ppm.

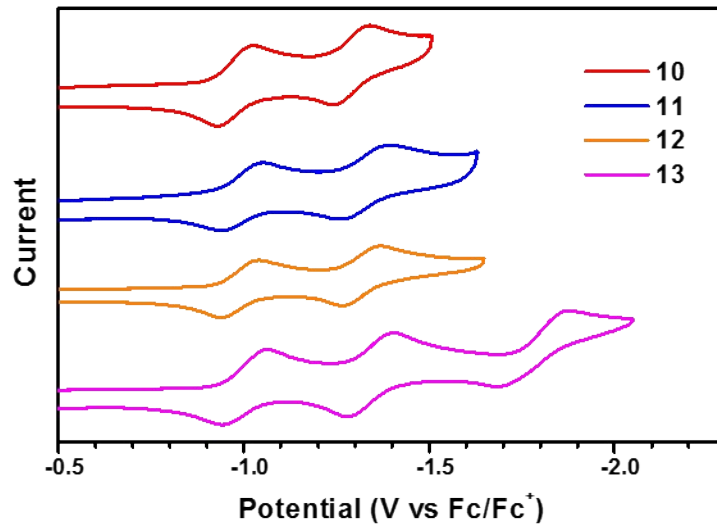

Figure S13: Cyclic voltammety of compounds 10-13.

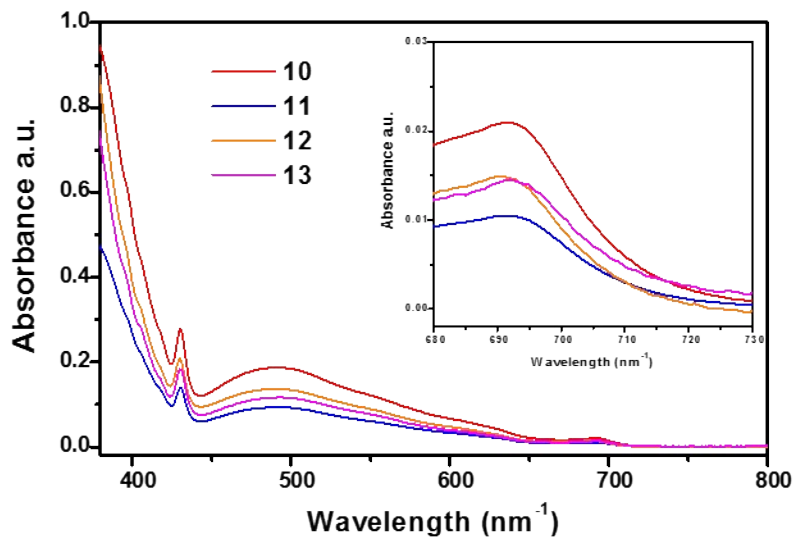

Figure S14: UV-Vis spectra of compounds 10-13.

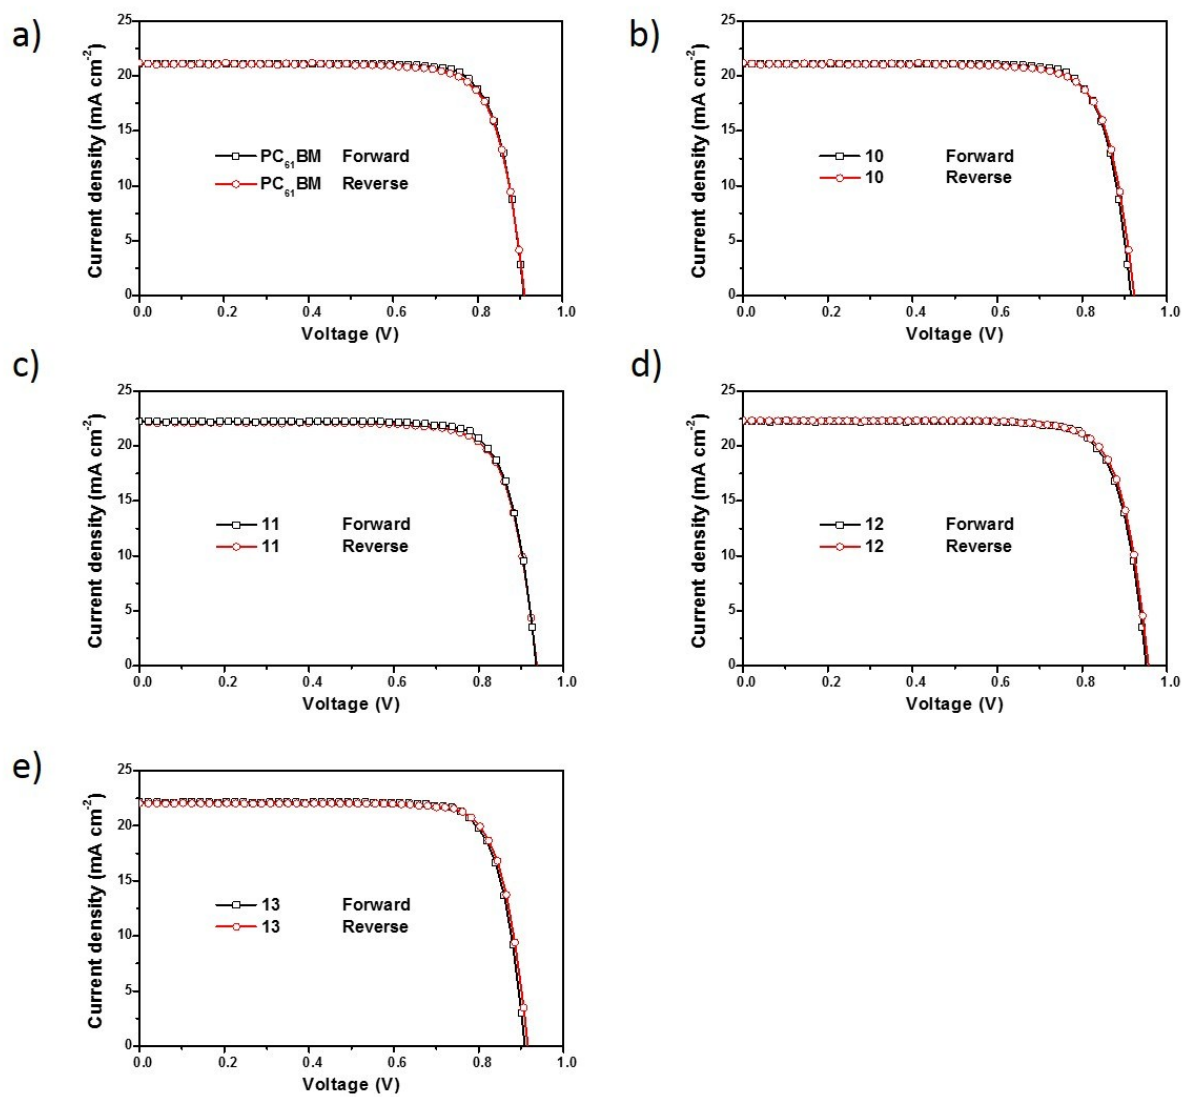

**Figure S15:** Forward and reverse scans for a) PC<sub>61</sub>BM, b) compound 10, c) compound 11, d) compound 12, e) compound 13.

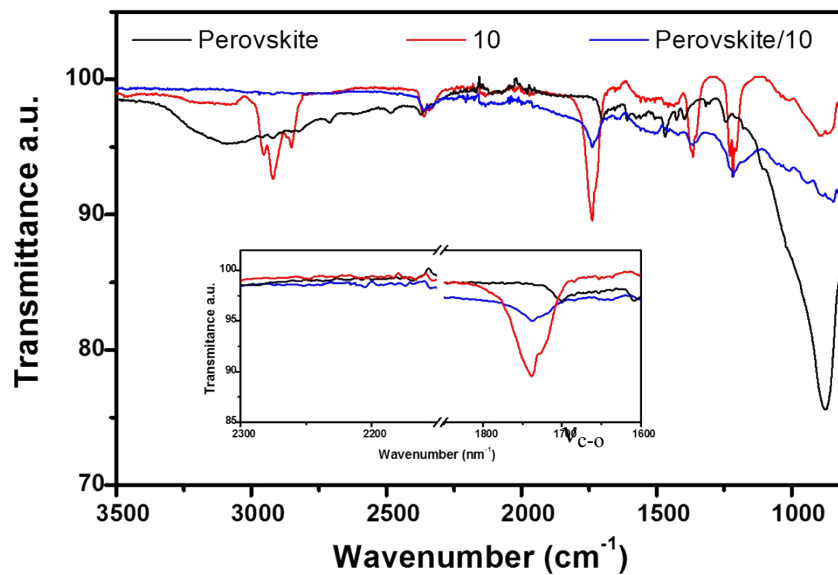

Figure S16: FTIR spectrum of compound 10.

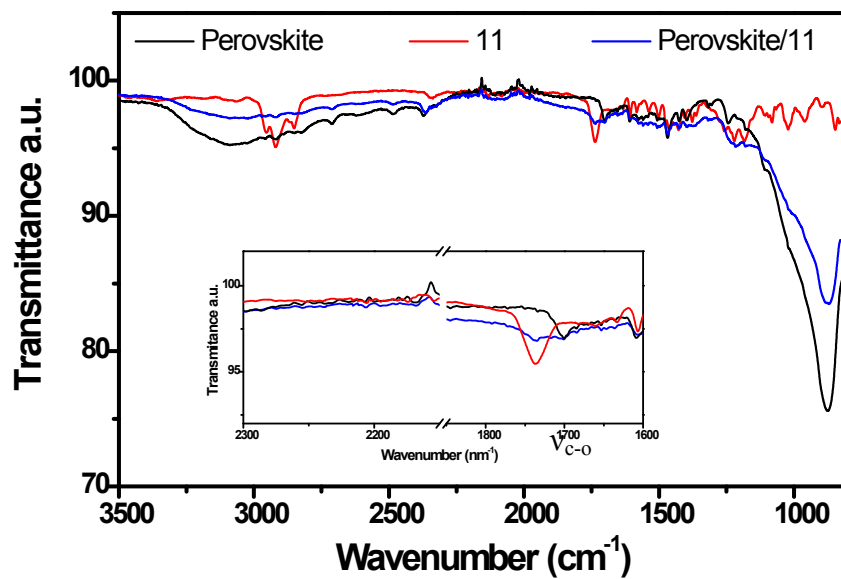

Figure S17: FTIR spectrum of compound 11.

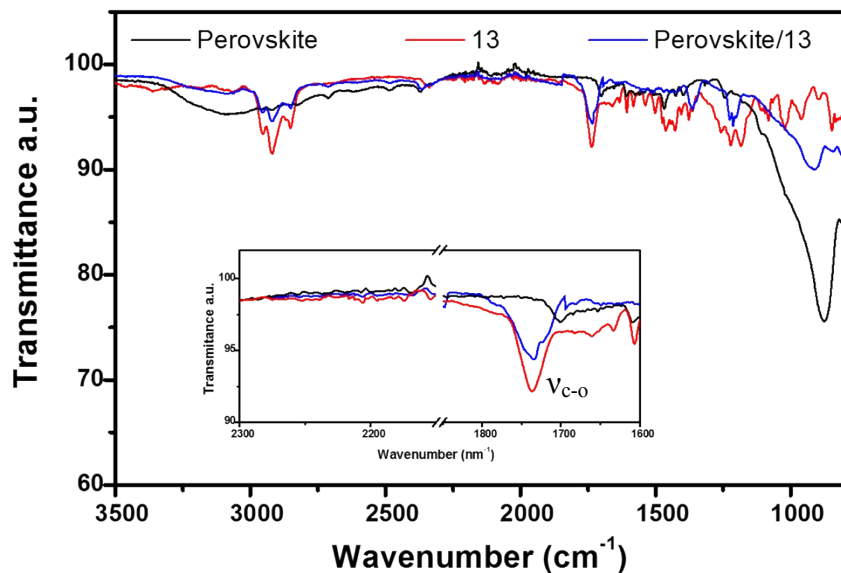

**Figure S18:** FTIR spectrum of compound **13**.

### Dielectric constant measurement

We followed the method reported by Hummelen *et al.*<sup>1</sup> Dielectric constants were obtained by spectral impedance measurements using the following architecture: ITO/PEDOT:PSS/fullerene/Al. The capacitance was determined by fitting the data to the equivalent circuit (Figure S19) for fabricated capacitors.

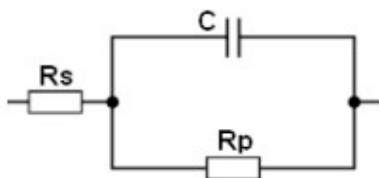

**Figure S19.** Equivalent circuit to fit the data, with capacitance ( $C$ ), parallel resistance ( $R_p$ ) and serial resistance ( $R_s$ ).

The dielectric constant was determined using the equation S1:

$$C = \epsilon_0 \epsilon_r \frac{A}{d} \quad (\text{S1})$$

where  $A$  is the capacitor's area ( $\text{m}^2$ ),  $d$  is the thickness of the fullerene film ( $\text{m}$ ) and  $\epsilon_0$  is the permittivity of vacuum ( $8.85 \times 10^{-12} \text{ F/m}$ ).

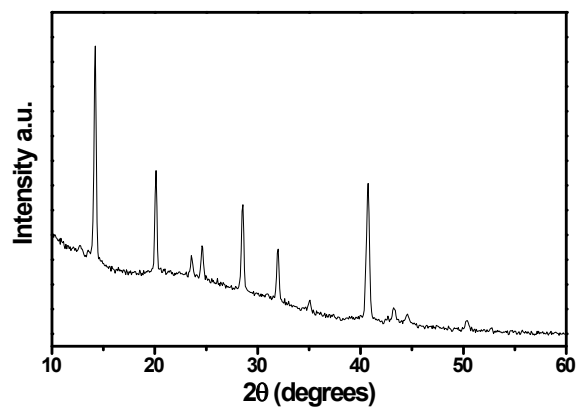

**Figure S20.** XRD of the perovskite film.

## References

1. F. Jahani, S. Torabi, R. C. Chiechi, L. J. A. Koster and J. C. Hummelen. *Chem. Commun.* 2014, **50**, 10645-10647.
